# Supplementary material for: Profiling Cisplatin Resistance in Head and Neck Cancer: A Critical Role of the VRAC Ion Channel for Chemoresistance
Source: MDPI journal article supplement (doi:10.3390/cancers13194831), 2021-09-27
Supplement: s1 [file s1]

*Supplementary Information*

# **Profiling cisplatin resistance in head and neck cancer: a critical role of the VRAC ion channel for chemoresistance**

**Svenja Siemer<sup>1</sup>, Torsten Fauth<sup>2</sup>, Paul Scholz<sup>2</sup>, Yara Al-Zamel<sup>1</sup>, Aya Khamis<sup>1</sup>, Désirée Gül<sup>1</sup>, Laura**

**Freudelsperger<sup>1</sup>, Barbara Wollenberg<sup>3</sup>, Sven Becker<sup>1,4</sup>, Roland H. Stauber<sup>1,\*</sup>, and Jan Hagemann<sup>1</sup>**

<sup>1</sup> Department of Otorhinolaryngology Head and Neck Surgery; Molecular and Cellular Oncology; University Medical Center, Mainz, Germany; svenja.siemer@uni-mainz.de (S.S); yalzamel@students.uni-mainz.de (Y.A.); ayakhamis@uni-mainz.de (A.K.); desiree.guel@unimedizin-mainz.de (D.G.); laura.freudelsperger@unimedizin-mainz.de (L.F.); rstauber@uni-mainz.de (R.S.); jan.hagemann@unimedizin-mainz.de (J.H.)

<sup>2</sup> BRAIN AG, Zwingenberg, Germany; ps@brain-biotech.de (P.S.); tf@brain-biotech.de (T.F.)

<sup>3</sup> Department of Otorhinolaryngology Head and Neck Surgery, University Hospital Klinikum rechts der Isar, Munich, Germany; Barbara.wollenberg@tum.de (B.W.)

<sup>4</sup> Department of Otorhinolaryngology, University Medical Center Tuebingen, Tuebingen, Germany; sven.becker@med.uni-tuebingen.de (S.B.)

\*Correspondence: rstauber@uni-mainz.de, Tel.: +49-0-6131177002

Received: date; Accepted: date; Published: date

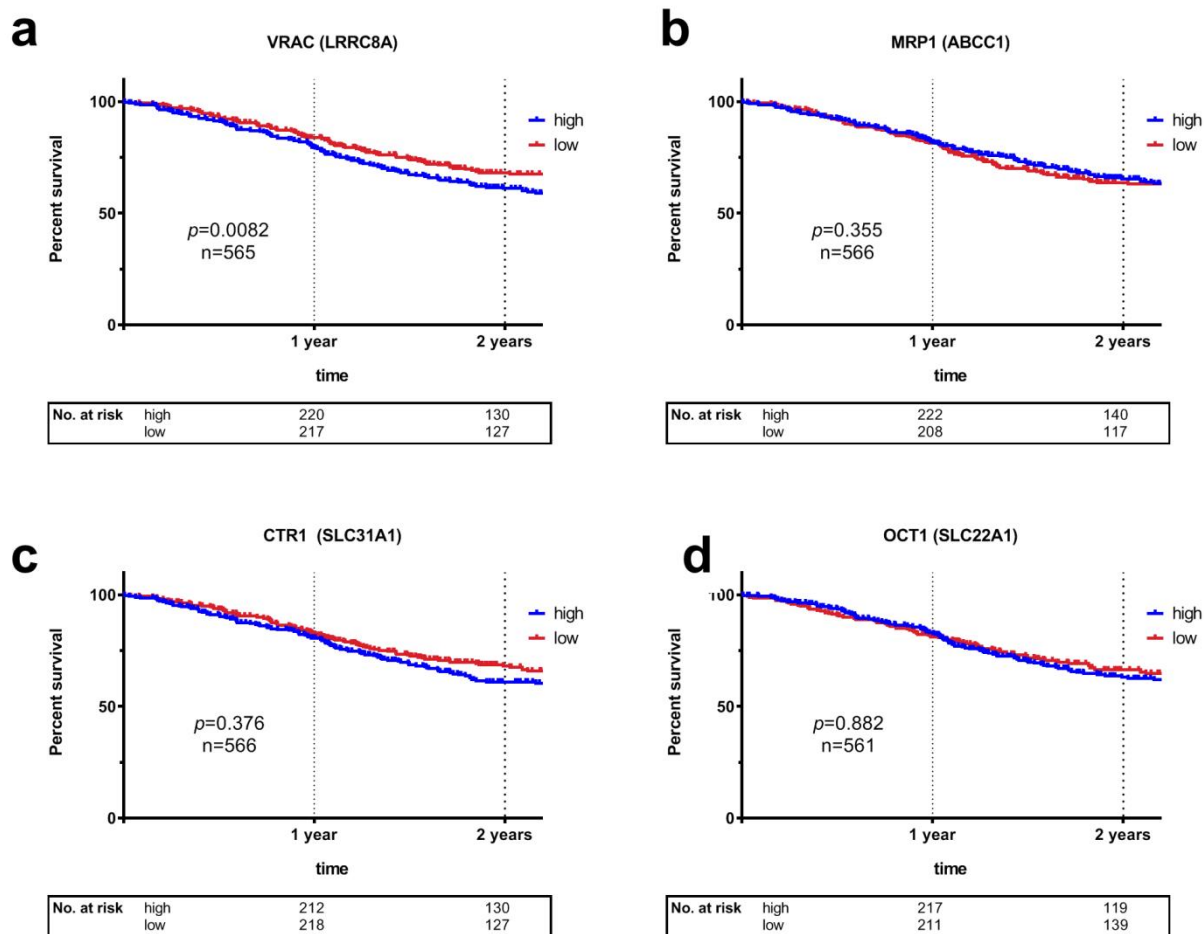

**Fig. S1: Overall survival of HNSCC patients correlating with potential cisplatin resistance candidates.** Overall survival of HNSCC patients depending on (a) VRAC (LRRC8A), (b) MRP1 (ABCC1), (c) CTR1 (SLC31A1), and (d) OCT1 (SLC22A1) expression levels shown by Kaplan Meier plots.

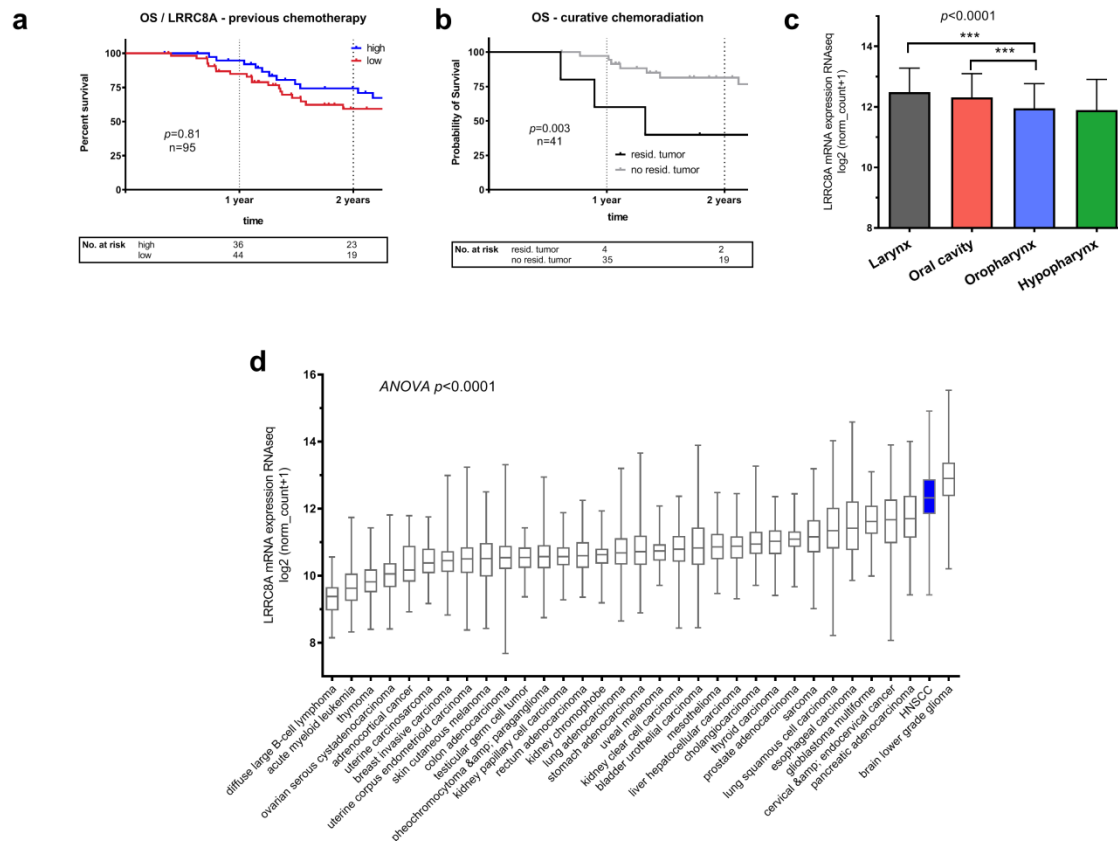

**Fig. S2: Significance of VRAC's expression for clinical data depends on case stratification. (a)** Overall survival of HNSCC patients, which received previous chemotherapy, depending on LRRC8A expression levels. **(b)** Overall survival of HNSCC patients, which showed or did not show residual tumors after curative chemoradiation. **(c)** Expression levels of LRRC8A across different types of cancers. HNSCC cancers show comparatively high levels of LRRC8A and are marked. **(d)** LRRC8A levels of HNSCC cancers are significantly different depending on localization.

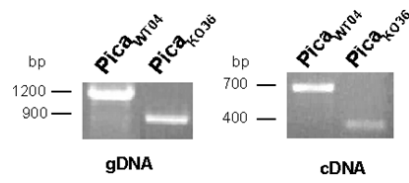

**Fig. S3: Genetic Analysis of LRRC8A-Knockout clone Pica<sub>KO36</sub>.** Knockout was confirmed on gDNA and cDNA level. For primers and expected band sizes, see Supplementary Table S2 and S3.

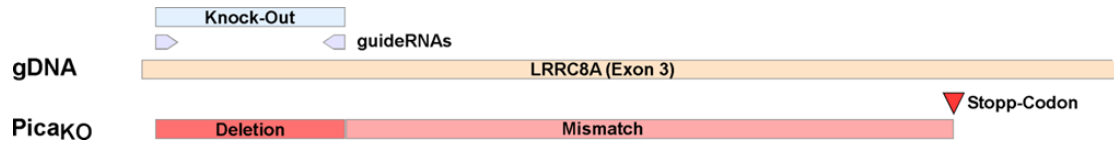

**Fig. S4: Next-generation sequencing confirms LRRC8A-knockout in clone Pica<sub>KO</sub>.** Visualization of the gDNA sequencing result of the knockout clone Pica<sub>KO</sub>. For primer sequences refer to Supplementary Table S2.

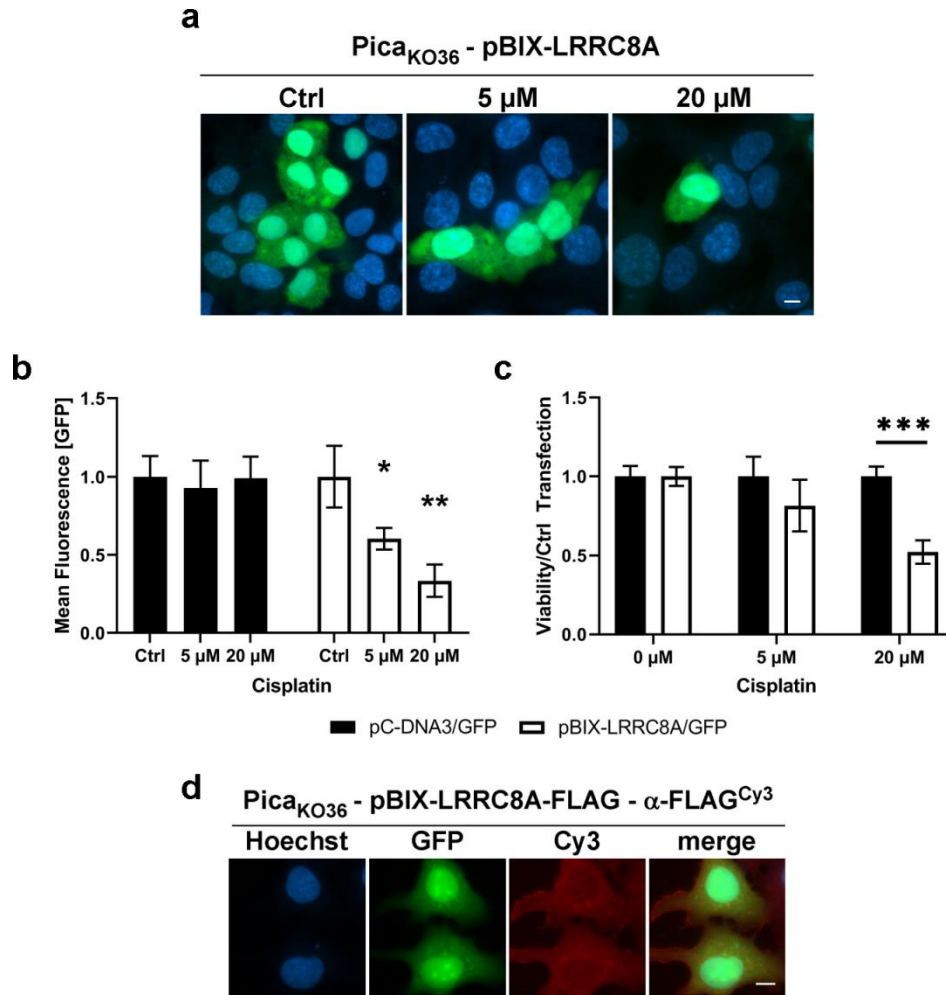

**Fig. S5: Ectopic expression of LRRC8A reconstituted VRAC channel function and significantly resensitized the resistant LRRC8A-knockout cell line Pica<sub>KO36</sub> to cisplatin mediated cell death.** (a-b) Pica<sub>KO36</sub> cells were co-transfected with pBIX-LRRC8A (1.8  $\mu$ g) together with pC3-GFP (0.2  $\mu$ g) plasmids or as control pC3-DNA3 (1.8  $\mu$ g) together with pC3-GFP (0.2  $\mu$ g) plasmids. 24 h later, cells were treated with indicated cisplatin concentrations for 48 h and the number of green cells quantified. (a) Microscopy images demonstrating that ectopic expression of LRRC8A resensitized Pica<sub>KO36</sub> cells to cisplatin, leading to cell death and decrease in the number of transfected green cells. (b) Automatic high-content microscopy to quantify the number of LRRC8A/GFP expressing cells. In contrast to the control (pC-DNA3/GFP; left), LRRC8A/GFP expressing cells (right) were killed by cisplatin concentration-dependently. (c) Ectopic expression of LRRC8A reconstituted VRAC channel function and resensitized the resistant LRRC8A-knockout Pica<sub>KO36</sub> cells to cisplatin mediated cell death. Viability was assessed by CellTiter-Glo<sup>®</sup> assay and normalized to untreated controls. (d) Pica<sub>KO36</sub> cells were transfected with pBIX-LRRC8A-FLAG (1.8  $\mu$ g) together with pC3-GFP (0.2  $\mu$ g) plasmids. Expression of the FLAG-tagged LRRC8A protein at the plasma membrane/cytoplasm was confirmed by anti-FLAG-staining (red). FLAG was stained with an anti-FLAG antibody and nuclei visualized by Hoechst 33342 staining. Scale bars, 10  $\mu$ m. Statistical analyses by unpaired Student's t-test. \*,  $p < 0.05$ ; \*\*,  $p < 0.01$ ; \*\*\*,  $p < 0.005$ .

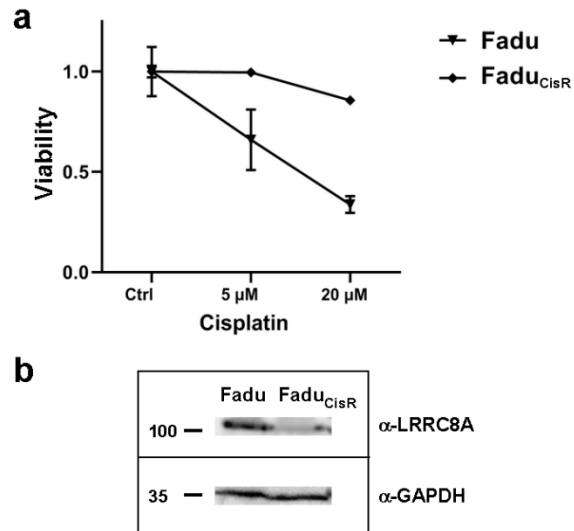

**Fig. S6: Permanent cisplatin selection leads to reduced levels of LRRC8A expression in Fadu cells. (a)** Fadu<sub>CisR</sub> are cisplatin-resistant. Cells treated for 48h and viability normalized to untreated controls. **(b)** Immunoblot analysis reveals decreased protein levels of LRRC8A in Fadu<sub>CisR</sub> cells. GAPDH served as loading control. MW (kD) is indicated.

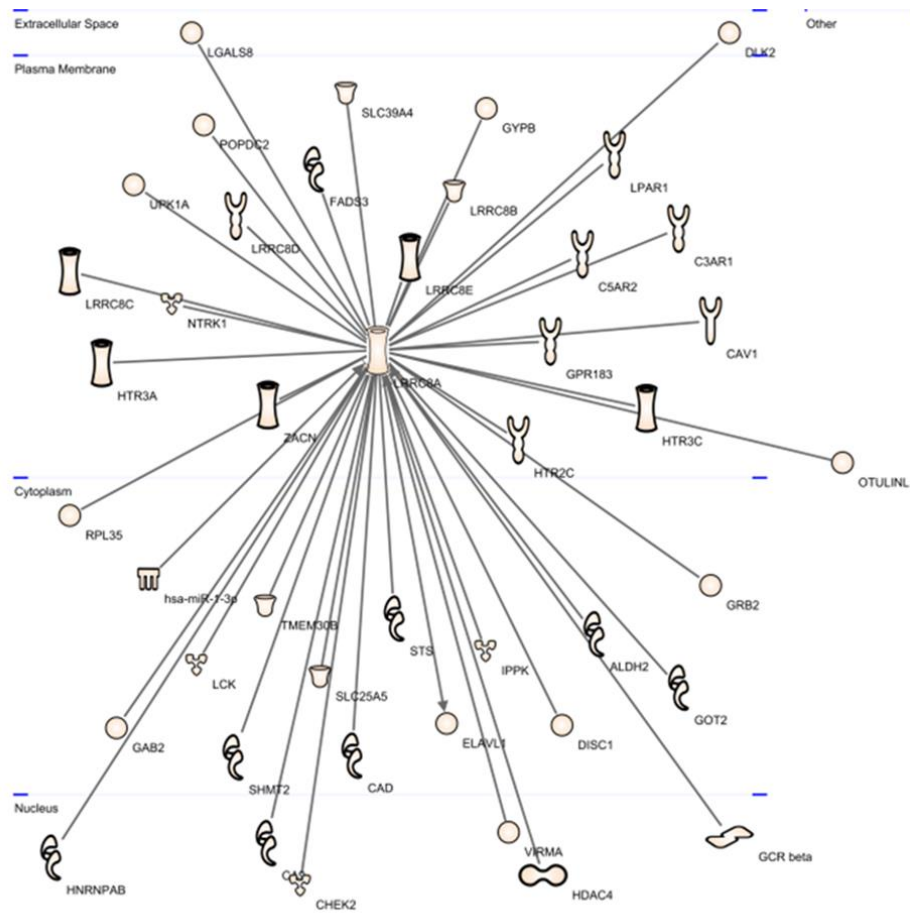

**Fig. S7: Molecular network of LRRC8A interaction partners involved in cancer diseases.** Ingenuity Pathway Analysis of known direct LRRC8A-interaction partners which are involved in development of cancer diseases. Cellular localization indicated.

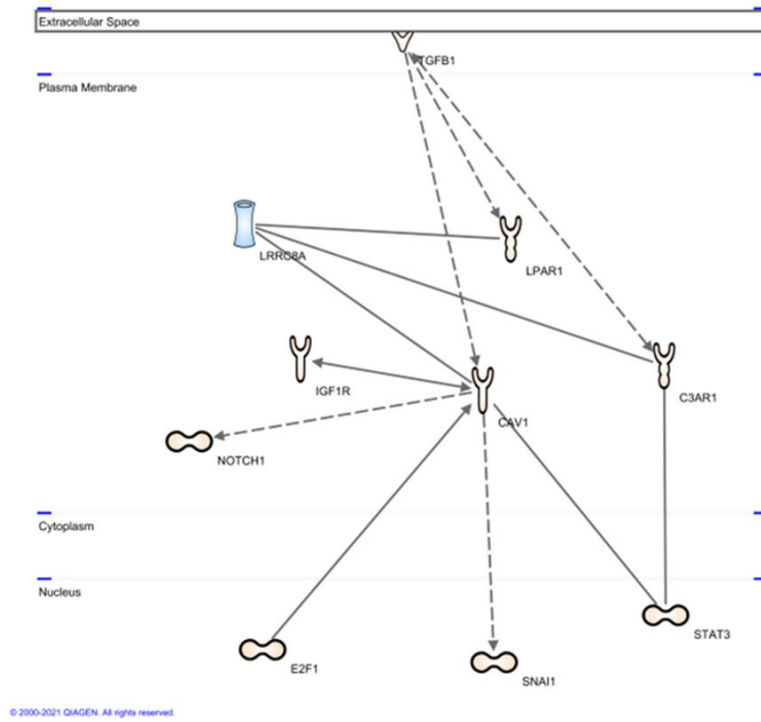

**Fig. S8: Molecular network of LRRC8A interaction partners involved in cisplatin resistance.** Ingenuity Pathway Analysis of known direct LRRC8A-interaction partners which are involved in development of cisplatin resistance. Cellular localization indicated.



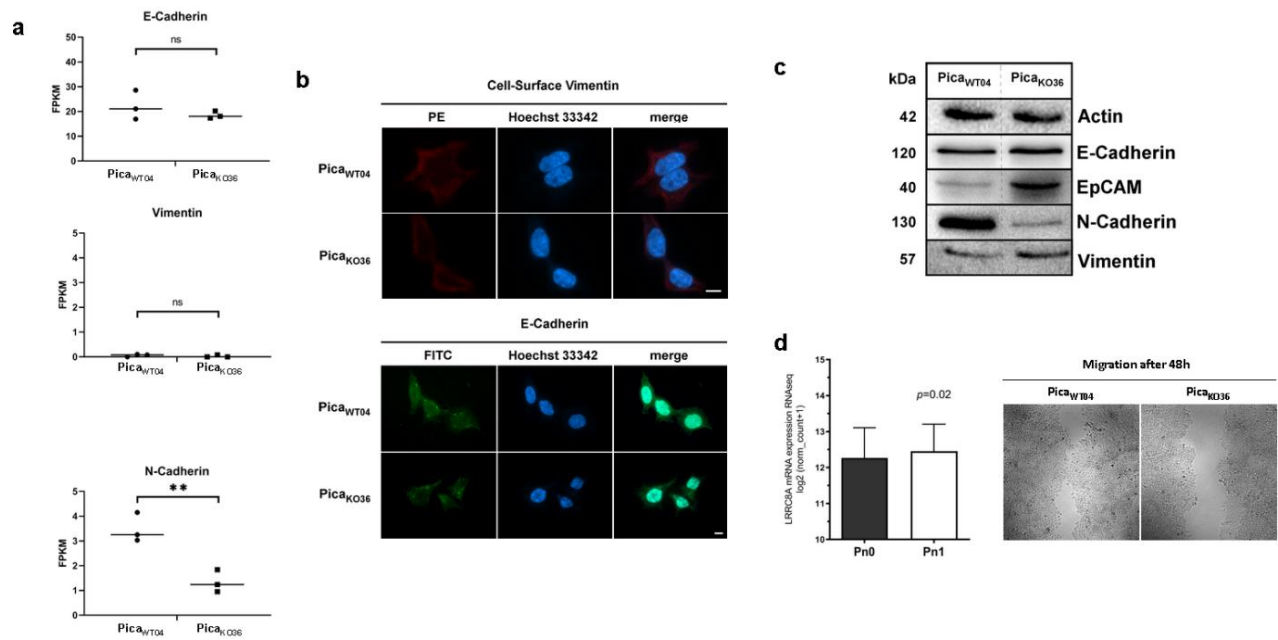

**Fig. S9: VRAC expression impacts cellular phenotype and migratory potential.** (a) Expression levels of EMT marker proteins in WT *versus* the VRAC-deficient KO cell line, Pica<sub>KO36</sub>. RNA intensities as FPKM values are displayed. (b) Fluorescence microscopy of cell-surface vimentin (red) and E-cadherin (green) (stained with specific antibodies), nuclei stained with Hoechst (blue). Scale bar, 10  $\mu$ m. (c) Western blot to demonstrate expression levels of indicated marker proteins. Actin served as loading control. (d) (Left) High VRAC expression levels may be associated with increased perineural sheath infiltration in the TCGA HNSCC patient (n=565) cohort (p=0.02). (Right) Low VRAC expression reduces the migratory potential of Pica<sub>KO36</sub> cells compared to Pica<sub>WT04</sub> cells. Cells were seeded into ibidi two-well dishes and microscopy images taken 48 h after removal of the silicone barrier.

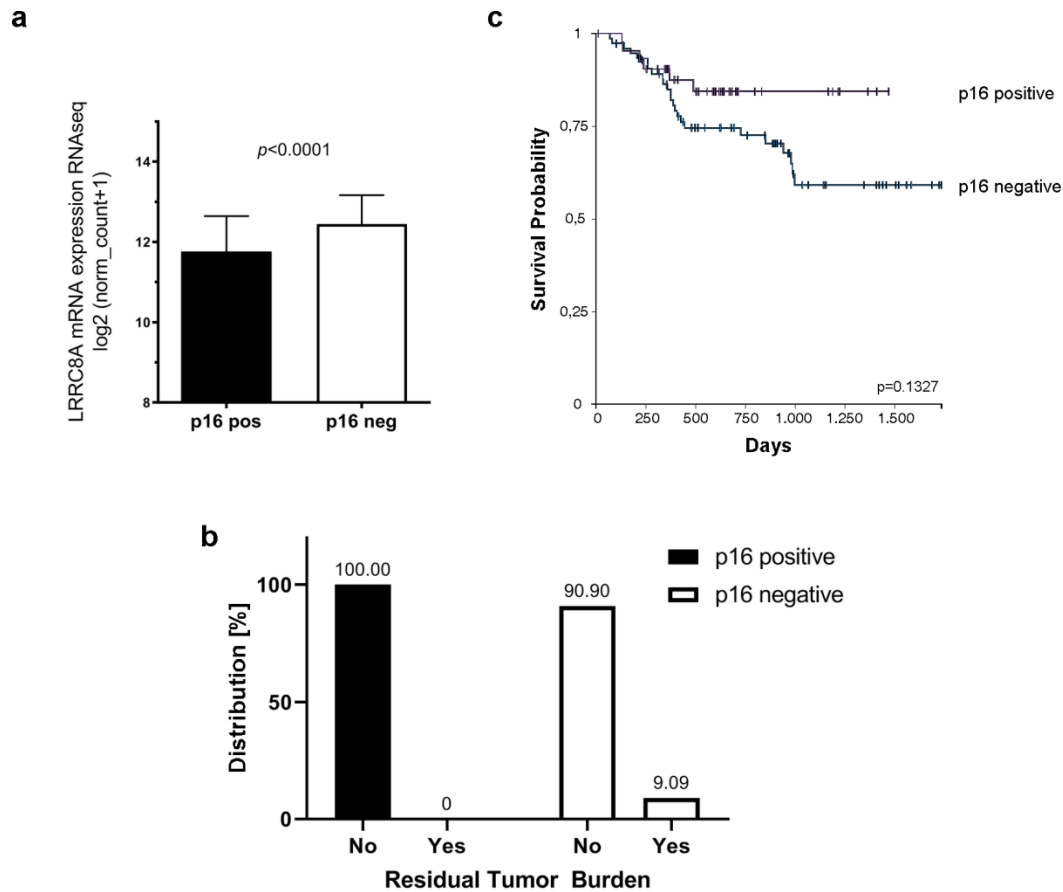

**Fig. S10: Correlation of LRRC8A expression and clinical characteristics depending on the HNSCC patients' HPV status.** Bioinformatic analyses were performed in the TCGA HNSCC cohort. **(a)** LRRC8A expression is significantly lower in HPV-positive (p16-positive) tumors. Bioinformatic analyses of HPV-positive *versus* -negative tumors (p16-testing as a surrogate marker for HPV-association) and LRRC8A expression were performed. **(b)** Overall survival of HNSCC patients depending on HPV status. HPV-positive patients show a better overall survival. **(c)** HPV-positive patients seem to respond better to chemoradiation. Patients with HPV-negative tumors have a higher likelihood of recurring tumor disease after treatment.

## Supplemental Tables

Tab. S1: Antibodies.

| Antigen                             | Host   | Manufacturer and<br>Article Number | Dilution (x-fold) |
|-------------------------------------|--------|------------------------------------|-------------------|
| <b><u>Western Blot Analysis</u></b> |        |                                    |                   |
| Actin                               | rabbit | Sigma Aldrich, A2066               | 5000              |
| E-Cadherin                          | mouse  | BD Bioscience, 610182              | 5000              |
| EpCAM/ CD326                        | mouse  | eBioscience; 13-9326               | 1000              |
| GAPDH                               | mouse  | Santa Cruz, sc-47724               | 3000              |
| LRRC8A                              | rabbit | Novusbio; NBP2-32082               | 500               |
| N-Cadherin                          | mouse  | BD Bioscience, 610921              | 5000              |
| Vimentin                            | mouse  | Abnova, H00007431-M08              | 1000              |
| Rabbit<br>(HRP coupled)             | goat   | Cell Signaling; 7074               | 5000              |
| Mouse<br>(HRP coupled)              | mouse  | Cell Signaling; 7076               | 5000              |
| <b><u>Immunofluorescence</u></b>    |        |                                    |                   |
| Cell-Surface<br>Vimentin-PE         | mouse  | Abnova, H00007431-MP08             | 200               |
| E-cadherin                          | mouse  | BD Bioscience, 610182              | 200               |
| EpCAM/CD326                         | mouse  | eBioscience; 13-9326               | 200               |
| FLAG                                | mouse  | Sigma, F3165                       | 300               |
| $\gamma$ H2AX                       | rabbit | Bethyl; A300-081A                  | 2000              |
| Rabbit<br>(Cy3 coupled)             | goat   | Dianova; 111-165-003               | 300               |
| Mouse<br>(Cy3 coupled)              | goat   | Dianova; 115-165-062               | 300               |

Tab. S2: Primer Sequences

| Name             | Sequence (5' → 3')     | Application                                           |
|------------------|------------------------|-------------------------------------------------------|
| LRRC8A_fw        | CTGGGATTACAGACGTGAAC   | Characterization knockout clone                       |
| LRRC8A_rev       | TGCTCGATCCGTGACTTG     | Characterization knockout clone                       |
| LRRC8A-cDNA_fw   | ATCCTTGGGGTTGAACCATGAT | Characterization knockout clone                       |
| sgRNA-LRRC8A_fw  | GCTGCGTGTCCGCAAAGTAG   | Guide sequence CRISPR/Cas9<br>LRRC8A knockout forward |
| sgRNA-LRRC8A_rev | CCGGCACCAGTACAACTACG   | Guide sequence CRISPR/Cas9<br>LRRC8A knockout reverse |

**Tab. S3: Expected Band Sizes Genomic Analysis**

| <b>Primer 1</b> | <b>Primer 2</b> | <b>Type of Analysis</b> | <b>Expected band size</b>               |
|-----------------|-----------------|-------------------------|-----------------------------------------|
| LRRC8A_fw       | LRRC8A_rev      | PCR on gDNA             | <b>WT: 1238 bp</b><br><b>KO: 942 bp</b> |
| LRRC8A-cDNA_fw  | LRRC8A_rev      | PCR on cDNA             | <b>WT: 679 bp</b><br><b>KO: 401 bp</b>  |

**Tab. S4: RNA Sequencing Results.** Only significantly differentially transcribed genes included. All values in FPKM.

| Sample/<br>Gene | Pica <sup>WT04</sup> |        |       | Pica <sup>KO36</sup> |        |        |
|-----------------|----------------------|--------|-------|----------------------|--------|--------|
|                 | 1                    | 2      | 3     | 1                    | 2      | 3      |
| HES4            | 29.67                | 21.93  | 16.09 | 18.35                | 8.06   | 10.49  |
| ISG15           | 105.64               | 122.38 | 47.75 | 31.34                | 48.54  | 43.34  |
| B3GALT6         | 14.05                | 13.78  | 14.26 | 13.86                | 9.25   | 8.90   |
| MFAP2           | 9.06                 | 7.11   | 5.10  | 1.14                 | 1.13   | 1.61   |
| CAMK2N1         | 6.20                 | 3.33   | 3.05  | 6.99                 | 6.78   | 8.55   |
| HSPG2           | 6.40                 | 1.19   | 1.04  | 2.61                 | 0.66   | 0.44   |
| MARCKSL1        | 47.98                | 43.49  | 39.08 | 25.97                | 20.44  | 23.27  |
| NCDN            | 16.13                | 11.13  | 11.62 | 13.85                | 7.08   | 8.17   |
| ZC3H12A         | 8.92                 | 2.05   | 2.31  | 2.03                 | 1.37   | 0.99   |
| SLC6A9          | 19.36                | 9.16   | 10.27 | 8.19                 | 7.38   | 5.35   |
| PLK3            | 5.60                 | 2.79   | 2.62  | 2.46                 | 1.27   | 2.02   |
| ZSWIM5          | 1.16                 | 1.02   | 1.03  | 2.32                 | 1.75   | 2.10   |
| TSPAN1          | 62.20                | 69.79  | 66.52 | 95.10                | 134.61 | 108.92 |
| CDKN2C          | 6.89                 | 6.45   | 7.46  | 14.15                | 11.82  | 11.65  |
| GADD45A         | 44.31                | 30.52  | 31.23 | 12.87                | 18.01  | 15.49  |
| IFI44           | 5.09                 | 10.45  | 2.63  | 0.50                 | 1.49   | 1.32   |
| ADGRL2          | 2.38                 | 1.92   | 1.32  | 0.75                 | 0.80   | 0.74   |
| DDAH1           | 5.69                 | 6.41   | 7.27  | 8.61                 | 10.72  | 8.56   |
| CNN3            | 24.76                | 30.79  | 25.42 | 12.31                | 20.99  | 18.46  |
| F3              | 42.61                | 29.60  | 23.65 | 8.45                 | 14.01  | 11.40  |
| SORT1           | 7.33                 | 9.82   | 10.40 | 6.47                 | 6.00   | 4.93   |
| PBXIP1          | 5.78                 | 4.72   | 3.77  | 9.23                 | 5.75   | 8.80   |
| KIRREL          | 7.89                 | 4.08   | 2.60  | 4.71                 | 2.31   | 2.40   |
| PVRL4           | 3.82                 | 3.90   | 2.56  | 1.99                 | 1.54   | 2.03   |
| CEP350          | 2.83                 | 3.16   | 2.35  | 4.37                 | 3.30   | 3.39   |
| GLUL            | 30.36                | 27.45  | 27.54 | 52.96                | 54.92  | 40.56  |
| LAMC2           | 27.45                | 15.13  | 11.67 | 8.41                 | 9.98   | 8.48   |
| FAM129A         | 4.11                 | 0.51   | 0.35  | 0.16                 | 0.73   | 0.24   |
| KIF21B          | 3.81                 | 1.05   | 1.11  | 1.22                 | 0.85   | 0.57   |
| CD55            | 28.80                | 40.58  | 38.29 | 14.70                | 27.44  | 18.33  |
| ATF3            | 2.90                 | 2.22   | 1.62  | 0.22                 | 1.05   | 1.22   |
| CENPF           | 15.25                | 19.93  | 15.73 | 24.19                | 20.19  | 17.45  |
| TGFB2           | 1.12                 | 1.51   | 0.66  | 2.57                 | 1.55   | 1.12   |
| TFB2M           | 13.07                | 15.84  | 15.89 | 19.68                | 21.50  | 21.59  |
| SCCPDH          | 2.64                 | 3.74   | 4.03  | 0.81                 | 1.48   | 1.98   |
| KLHL29          | 3.55                 | 1.76   | 1.07  | 1.69                 | 0.87   | 1.04   |
| LBH             | 33.14                | 43.63  | 62.06 | 32.22                | 20.38  | 18.81  |
| CDC42EP3        | 2.78                 | 2.34   | 2.17  | 1.46                 | 1.20   | 1.41   |
| EPAS1           | 21.85                | 26.41  | 16.08 | 17.89                | 14.03  | 12.25  |
| BCL11A          | 1.89                 | 2.43   | 1.25  | 0.56                 | 0.44   | 0.69   |

| Sample/<br>Gene | Pica <sub>WT04</sub> |        |        | Pica <sub>KO36</sub> |        |        |
|-----------------|----------------------|--------|--------|----------------------|--------|--------|
|                 | 1                    | 2      | 3      | 1                    | 2      | 3      |
| PELI1           | 4.46                 | 3.32   | 2.85   | 6.51                 | 5.82   | 6.33   |
| TGFA            | 9.12                 | 6.81   | 5.24   | 2.84                 | 4.64   | 4.28   |
| ADD2            | 17.85                | 12.67  | 12.31  | 10.91                | 8.89   | 7.23   |
| CYP26B1         | 7.34                 | 4.54   | 3.39   | 2.42                 | 1.67   | 1.72   |
| SLC4A5          | 3.12                 | 4.04   | 4.74   | 1.82                 | 2.70   | 2.54   |
| MTHFD2          | 248.90               | 253.55 | 291.77 | 144.23               | 206.93 | 168.14 |
| HK2             | 15.38                | 11.52  | 13.45  | 4.43                 | 4.64   | 3.93   |
| CAPG            | 19.23                | 18.13  | 17.14  | 7.41                 | 12.02  | 13.40  |
| CHST10          | 2.64                 | 4.14   | 4.23   | 1.30                 | 1.33   | 1.70   |
| MALL            | 5.25                 | 4.24   | 7.47   | 2.06                 | 3.31   | 3.32   |
| SLC20A1         | 17.82                | 18.42  | 13.67  | 10.78                | 11.61  | 9.97   |
| IL1B            | 19.31                | 3.61   | 3.09   | 1.03                 | 1.45   | 1.43   |
| IL1A            | 9.58                 | 1.09   | 0.57   | 0.30                 | 0.52   | 0.62   |
| STEAP3          | 11.38                | 9.46   | 10.29  | 8.08                 | 7.42   | 5.42   |
| ARHGEF4         | 6.11                 | 4.39   | 4.91   | 4.49                 | 2.84   | 2.43   |
| FMNL2           | 5.76                 | 7.10   | 4.66   | 3.13                 | 3.96   | 3.04   |
| SERPINE2        | 6.47                 | 5.20   | 3.11   | 0.58                 | 1.52   | 0.65   |
| SLC4A7          | 4.83                 | 4.64   | 3.96   | 2.94                 | 2.87   | 1.49   |
| SEMA3B          | 6.24                 | 4.70   | 4.88   | 2.72                 | 3.40   | 2.96   |
| IFRD2           | 83.96                | 65.23  | 72.86  | 62.07                | 58.14  | 45.28  |
| FSTL1           | 0.94                 | 1.55   | 1.22   | 2.42                 | 2.15   | 3.10   |
| GOLGB1          | 4.53                 | 5.66   | 4.39   | 8.16                 | 5.99   | 5.60   |
| AMOTL2          | 21.83                | 13.68  | 13.53  | 33.09                | 19.97  | 22.75  |
| PCOLCE2         | 4.86                 | 9.50   | 8.11   | 3.35                 | 4.88   | 3.52   |
| TM4SF1          | 23.03                | 30.37  | 20.34  | 8.06                 | 11.41  | 8.11   |
| GPR87           | 16.03                | 21.34  | 22.06  | 24.11                | 28.29  | 36.47  |
| LAMP3           | 2.46                 | 1.67   | 1.20   | 0.59                 | 0.60   | 0.41   |
| SOX2            | 9.39                 | 7.02   | 5.67   | 1.19                 | 0.31   | 0.57   |
| ST6GAL1         | 1.70                 | 1.61   | 1.07   | 0.42                 | 0.63   | 0.37   |
| CLDN1           | 19.57                | 10.60  | 6.60   | 6.96                 | 7.49   | 5.92   |
| CPLX1           | 2.67                 | 2.31   | 2.53   | 15.33                | 6.71   | 5.78   |
| FGFR3           | 157.17               | 96.55  | 89.51  | 398.23               | 164.80 | 192.87 |
| MXD4            | 7.82                 | 6.07   | 5.94   | 14.43                | 7.92   | 10.37  |
| SEL1L3          | 7.77                 | 5.24   | 4.33   | 2.20                 | 3.08   | 2.31   |
| CXCL8           | 59.91                | 29.51  | 35.02  | 3.14                 | 5.78   | 4.55   |
| CXCL1           | 29.21                | 4.44   | 4.05   | 0.92                 | 1.21   | 1.42   |
| CCNG2           | 1.81                 | 2.62   | 1.54   | 3.32                 | 3.28   | 4.42   |
| CENPE           | 2.16                 | 5.04   | 4.14   | 4.67                 | 4.82   | 4.70   |
| TET2            | 1.52                 | 1.49   | 1.31   | 2.37                 | 1.82   | 1.95   |
| LEF1            | 1.90                 | 1.88   | 1.35   | 0.58                 | 0.90   | 0.85   |
| PRSS12          | 1.86                 | 1.96   | 1.74   | 0.66                 | 1.02   | 0.39   |
| SLC7A11         | 10.58                | 8.74   | 10.94  | 6.47                 | 5.22   | 4.52   |

| Sample/<br>Gene | Pica <sub>WT04</sub> |       |       | Pica <sub>KO36</sub> |       |       |
|-----------------|----------------------|-------|-------|----------------------|-------|-------|
|                 | 1                    | 2     | 3     | 1                    | 2     | 3     |
| ELF2            | 4.49                 | 5.22  | 6.11  | 8.15                 | 6.81  | 8.92  |
| ARHGAP10        | 5.27                 | 3.21  | 4.22  | 4.54                 | 6.72  | 6.89  |
| DDX60           | 2.48                 | 2.91  | 0.93  | 0.94                 | 1.32  | 1.07  |
| LPCAT1          | 20.19                | 14.32 | 12.90 | 12.42                | 11.36 | 7.66  |
| IRX4            | 15.46                | 14.51 | 10.67 | 9.89                 | 6.47  | 6.62  |
| MYO10           | 7.44                 | 4.02  | 4.05  | 3.72                 | 3.53  | 2.62  |
| RAI14           | 4.83                 | 4.63  | 5.01  | 2.60                 | 3.23  | 2.57  |
| OSMR            | 8.31                 | 7.42  | 2.89  | 2.72                 | 4.53  | 2.98  |
| FST             | 25.89                | 23.51 | 28.36 | 7.82                 | 6.63  | 5.77  |
| POLR3G          | 7.37                 | 6.78  | 7.54  | 3.40                 | 5.13  | 4.05  |
| PGGT1B          | 1.47                 | 2.34  | 2.30  | 3.21                 | 4.50  | 3.22  |
| FBN2            | 8.36                 | 6.28  | 4.41  | 2.54                 | 2.58  | 1.68  |
| HBEGF           | 3.47                 | 0.97  | 1.18  | 0.56                 | 0.44  | 0.75  |
| FAT2            | 2.49                 | 1.56  | 0.80  | 5.23                 | 2.24  | 1.88  |
| GABRP           | 2.46                 | 0.93  | 0.63  | 2.90                 | 2.26  | 3.14  |
| DUSP1           | 4.06                 | 3.56  | 3.82  | 1.37                 | 1.33  | 1.90  |
| STC2            | 39.26                | 24.86 | 27.83 | 14.73                | 16.88 | 10.89 |
| DBN1            | 6.35                 | 5.11  | 3.53  | 0.54                 | 0.69  | 0.35  |
| N4BP3           | 5.40                 | 2.74  | 2.04  | 9.60                 | 4.58  | 4.25  |
| GFPT2           | 5.75                 | 7.17  | 4.72  | 0.66                 | 1.48  | 0.72  |
| FOXQ1           | 2.51                 | 2.66  | 2.40  | 2.17                 | 0.96  | 1.33  |
| TUBB2A          | 7.91                 | 5.38  | 5.25  | 2.51                 | 3.22  | 1.59  |
| NEDD9           | 3.75                 | 3.15  | 2.71  | 10.46                | 5.78  | 6.45  |
| TRIM38          | 4.26                 | 4.68  | 3.29  | 5.09                 | 5.51  | 6.73  |
| HLA-B           | 46.70                | 15.07 | 4.35  | 1.98                 | 4.08  | 2.91  |
| TAP2            | 39.60                | 21.83 | 20.42 | 19.39                | 19.10 | 10.36 |
| CDKN1A          | 9.79                 | 4.39  | 1.72  | 1.24                 | 1.48  | 1.77  |
| PEX6            | 6.00                 | 4.70  | 3.20  | 10.99                | 6.01  | 6.84  |
| VEGFA           | 38.05                | 22.48 | 23.10 | 17.58                | 14.24 | 15.91 |
| ADGRF1          | 11.31                | 4.71  | 7.58  | 13.76                | 13.11 | 13.56 |
| KCNQ5           | 2.29                 | 2.21  | 1.52  | 1.19                 | 1.36  | 0.71  |
| ZNF292          | 1.65                 | 1.72  | 1.42  | 2.26                 | 1.88  | 2.25  |
| FYN             | 4.09                 | 2.67  | 2.11  | 0.85                 | 1.63  | 1.29  |
| GJA1            | 17.89                | 20.47 | 17.66 | 11.51                | 13.33 | 8.93  |
| TNFAIP3         | 8.24                 | 0.49  | 0.38  | 0.14                 | 0.17  | 0.07  |
| UTRN            | 1.05                 | 0.85  | 0.48  | 2.07                 | 1.49  | 1.55  |
| SASH1           | 3.26                 | 2.57  | 1.59  | 6.83                 | 3.14  | 4.25  |
| UST             | 2.93                 | 1.96  | 1.90  | 0.96                 | 1.04  | 1.00  |
| AKAP12          | 9.88                 | 5.70  | 6.05  | 0.62                 | 1.14  | 0.73  |
| SOD2            | 50.82                | 16.38 | 15.49 | 17.15                | 12.31 | 13.37 |
| DFNA5           | 5.28                 | 4.24  | 3.88  | 0.77                 | 2.98  | 2.20  |
| CPVL            | 7.01                 | 10.04 | 8.28  | 2.15                 | 4.79  | 2.38  |



| Sample/<br>Gene | Pica <sub>WT04</sub> |       |       | Pica <sub>KO36</sub> |       |        |
|-----------------|----------------------|-------|-------|----------------------|-------|--------|
|                 | 1                    | 2     | 3     | 1                    | 2     | 3      |
| GARS            | 84.19                | 83.88 | 98.65 | 47.46                | 72.19 | 55.49  |
| STK17A          | 17.21                | 17.44 | 16.55 | 9.04                 | 13.75 | 10.90  |
| IGFBP3          | 1.60                 | 1.54  | 0.95  | 5.96                 | 3.12  | 5.08   |
| COBL            | 4.81                 | 4.18  | 4.04  | 2.54                 | 3.11  | 2.19   |
| GRB10           | 28.14                | 28.94 | 25.20 | 17.91                | 19.99 | 15.31  |
| ASL             | 16.04                | 14.12 | 15.93 | 11.53                | 11.55 | 8.29   |
| SBDSP1          | 13.16                | 11.98 | 13.91 | 6.83                 | 8.44  | 6.83   |
| SEMA3E          | 1.19                 | 1.26  | 1.33  | 2.12                 | 2.04  | 2.48   |
| SEMA3C          | 20.01                | 12.59 | 6.01  | 4.74                 | 4.95  | 3.71   |
| AKAP9           | 2.21                 | 5.08  | 4.51  | 6.17                 | 5.09  | 5.40   |
| CDK6            | 5.10                 | 3.69  | 2.89  | 1.83                 | 1.94  | 1.49   |
| NAMPT           | 20.53                | 21.47 | 20.45 | 10.43                | 16.47 | 12.68  |
| IFRD1           | 14.80                | 14.14 | 14.21 | 6.01                 | 8.49  | 7.03   |
| MET             | 21.10                | 14.64 | 12.64 | 10.64                | 10.22 | 8.99   |
| ZNF467          | 2.53                 | 2.80  | 1.18  | 1.38                 | 1.21  | 0.65   |
| LRRCC61         | 23.12                | 18.04 | 18.31 | 13.49                | 11.38 | 9.19   |
| NEIL2           | 11.41                | 12.44 | 13.56 | 4.66                 | 9.77  | 5.76   |
| STC1            | 1.68                 | 2.88  | 0.76  | 0.71                 | 0.83  | 0.46   |
| LOXL2           | 34.44                | 12.48 | 13.57 | 10.95                | 12.49 | 14.01  |
| NRG1            | 3.41                 | 1.54  | 2.24  | 0.22                 | 0.38  | 0.29   |
| PCMTD1          | 5.65                 | 7.21  | 6.33  | 8.10                 | 7.29  | 9.50   |
| PLAG1           | 2.36                 | 2.25  | 2.09  | 3.73                 | 2.65  | 3.46   |
| LRRCC1          | 3.67                 | 4.78  | 5.33  | 5.08                 | 7.65  | 6.82   |
| CA2             | 6.30                 | 3.26  | 3.13  | 0.65                 | 2.14  | 0.50   |
| DECR1           | 21.78                | 36.82 | 35.42 | 30.50                | 51.62 | 48.78  |
| DPY19L4         | 8.20                 | 9.83  | 7.73  | 11.51                | 11.63 | 10.56  |
| NIPAL2          | 3.18                 | 3.39  | 2.19  | 6.32                 | 4.31  | 5.53   |
| TRIB1           | 13.75                | 15.19 | 10.30 | 10.10                | 10.24 | 5.93   |
| ST3GAL1         | 13.91                | 6.12  | 7.32  | 3.45                 | 5.02  | 4.76   |
| NDRG1           | 44.21                | 37.42 | 29.92 | 56.36                | 45.18 | 102.16 |
| MROH6           | 2.11                 | 1.75  | 1.24  | 5.24                 | 2.62  | 2.72   |
| FBXL6           | 7.65                 | 7.35  | 7.75  | 4.84                 | 4.71  | 4.29   |
| BOP1            | 54.27                | 36.41 | 38.65 | 48.92                | 32.90 | 29.14  |
| MFSD3           | 34.70                | 21.96 | 23.34 | 25.94                | 14.34 | 12.72  |
| PLIN2           | 17.62                | 18.77 | 17.42 | 8.79                 | 12.86 | 12.87  |
| AQP3            | 40.20                | 27.44 | 24.67 | 5.36                 | 9.76  | 5.16   |
| ANXA2P2         | 24.13                | 27.76 | 27.29 | 15.17                | 19.75 | 18.10  |
| CA9             | 4.82                 | 3.81  | 3.45  | 7.09                 | 4.11  | 16.26  |
| FAM201A         | 1.81                 | 1.88  | 2.63  | 5.91                 | 3.54  | 4.65   |
| SMC5            | 7.43                 | 9.46  | 8.48  | 11.36                | 10.85 | 10.54  |
| VPS13A          | 3.62                 | 3.44  | 3.04  | 5.74                 | 3.75  | 3.19   |
| TLE1            | 6.58                 | 4.08  | 3.07  | 2.88                 | 2.64  | 2.81   |

| Sample/<br>Gene | Pica <sub>WT04</sub> |        |        | Pica <sub>KO36</sub> |        |        |
|-----------------|----------------------|--------|--------|----------------------|--------|--------|
|                 | 1                    | 2      | 3      | 1                    | 2      | 3      |
| PSAT1           | 151.10               | 129.31 | 151.39 | 81.96                | 99.05  | 68.50  |
| C9orf64         | 1.81                 | 1.09   | 1.69   | 2.67                 | 3.34   | 3.37   |
| FGD3            | 1.78                 | 1.06   | 0.99   | 3.35                 | 2.77   | 3.08   |
| CORO2A          | 11.18                | 7.03   | 6.10   | 4.61                 | 5.20   | 4.86   |
| COL27A1         | 5.95                 | 3.98   | 3.36   | 4.60                 | 2.39   | 1.96   |
| CNTRL           | 2.83                 | 3.42   | 2.23   | 4.46                 | 3.92   | 4.20   |
| PTGS1           | 4.62                 | 3.60   | 1.73   | 3.67                 | 5.93   | 6.52   |
| LCN2            | 110.70               | 11.99  | 10.03  | 7.72                 | 8.08   | 10.12  |
| LRRC8A          | 29.36                | 19.88  | 21.06  | 17.63                | 12.20  | 15.18  |
| NCS1            | 19.17                | 14.77  | 16.14  | 11.77                | 9.86   | 9.34   |
| ASS1            | 155.64               | 68.36  | 75.94  | 32.34                | 41.29  | 34.96  |
| FIBCD1          | 5.65                 | 3.60   | 3.68   | 12.95                | 5.02   | 6.52   |
| EGFL7           | 51.12                | 25.84  | 26.93  | 17.11                | 13.81  | 13.25  |
| CLIC3           | 2.21                 | 0.94   | 1.61   | 9.71                 | 6.79   | 10.54  |
| UAP1L1          | 3.06                 | 4.10   | 3.18   | 3.01                 | 1.54   | 1.83   |
| ABCA2           | 10.33                | 7.15   | 7.29   | 23.06                | 9.26   | 10.21  |
| IL15RA          | 8.40                 | 4.09   | 4.24   | 2.86                 | 2.14   | 2.40   |
| FAM107B         | 9.17                 | 8.35   | 6.70   | 3.32                 | 5.54   | 2.93   |
| RASGEF1A        | 6.06                 | 7.23   | 5.34   | 3.30                 | 3.87   | 3.13   |
| ANXA8           | 8.43                 | 9.52   | 7.34   | 5.33                 | 7.00   | 6.70   |
| ANXA8           | 14.49                | 10.45  | 10.12  | 9.90                 | 10.16  | 9.25   |
| DKK1            | 35.27                | 45.29  | 49.22  | 27.76                | 34.47  | 21.74  |
| FUT11           | 1.04                 | 0.80   | 0.44   | 3.72                 | 1.82   | 1.52   |
| SNCG            | 70.02                | 70.73  | 83.01  | 106.16               | 106.00 | 111.32 |
| ADIRF           | 46.81                | 49.66  | 62.62  | 73.08                | 91.17  | 92.25  |
| IFIT2           | 6.65                 | 7.82   | 3.18   | 1.77                 | 4.00   | 2.94   |
| IFIT3           | 7.94                 | 7.93   | 2.98   | 1.13                 | 3.27   | 1.94   |
| KIF20B          | 6.30                 | 13.34  | 13.03  | 12.36                | 14.63  | 14.05  |
| IFIT1           | 5.16                 | 5.67   | 1.74   | 1.21                 | 3.39   | 1.72   |
| HHEX            | 8.38                 | 11.09  | 9.62   | 6.28                 | 4.98   | 5.53   |
| ZNF518A         | 2.60                 | 3.84   | 3.98   | 4.64                 | 4.02   | 4.16   |
| ANKRD2          | 33.87                | 16.60  | 29.29  | 54.55                | 47.18  | 45.59  |
| NFKB2           | 29.57                | 14.65  | 11.17  | 11.90                | 9.86   | 8.91   |
| COL17A1         | 3.45                 | 1.39   | 0.77   | 0.48                 | 0.39   | 0.76   |
| FGFR2           | 7.85                 | 5.60   | 5.52   | 14.67                | 9.93   | 11.30  |
| TNNI2           | 14.34                | 26.79  | 31.36  | 50.47                | 48.68  | 59.77  |
| TNNT3           | 4.55                 | 14.50  | 13.79  | 16.73                | 16.82  | 29.14  |
| PHLDA2          | 78.33                | 69.44  | 77.02  | 75.30                | 46.53  | 49.32  |
| PRRG4           | 6.96                 | 10.22  | 10.50  | 11.07                | 11.93  | 12.40  |
| ABTB2           | 4.31                 | 2.38   | 1.46   | 1.92                 | 1.23   | 1.13   |
| CD44            | 10.03                | 9.09   | 5.31   | 0.52                 | 1.67   | 1.05   |
| MAPK8IP1        | 3.19                 | 4.01   | 2.90   | 2.43                 | 1.97   | 1.70   |

| Sample/<br>Gene | Pica <sub>WT04</sub> |        |        | Pica <sub>KO36</sub> |        |        |
|-----------------|----------------------|--------|--------|----------------------|--------|--------|
|                 | 1                    | 2      | 3      | 1                    | 2      | 3      |
| MDK             | 87.65                | 64.27  | 63.76  | 23.62                | 26.53  | 28.82  |
| FAM111B         | 2.52                 | 3.41   | 4.00   | 4.55                 | 5.28   | 4.65   |
| FAM111A         | 2.62                 | 2.00   | 1.05   | 3.08                 | 2.52   | 4.03   |
| TMEM132A        | 47.44                | 17.75  | 16.39  | 33.05                | 12.75  | 12.85  |
| RAB3IL1         | 8.46                 | 3.96   | 4.03   | 1.92                 | 1.55   | 1.45   |
| WDR74           | 40.34                | 41.87  | 42.57  | 64.94                | 69.55  | 69.15  |
| ATL3            | 1.93                 | 2.76   | 2.79   | 0.73                 | 1.35   | 1.51   |
| DNAJC4          | 5.09                 | 3.47   | 4.63   | 9.18                 | 6.41   | 9.11   |
| MAP4K2          | 4.45                 | 2.89   | 2.25   | 2.77                 | 2.12   | 0.92   |
| NEAT1           | 51.86                | 45.62  | 32.75  | 26.55                | 24.16  | 21.64  |
| SYT12           | 33.93                | 41.11  | 39.22  | 65.63                | 60.73  | 50.43  |
| CDK2AP2         | 100.72               | 73.96  | 78.53  | 173.58               | 117.96 | 133.20 |
| PITPNM1         | 52.14                | 30.29  | 25.58  | 91.01                | 42.09  | 43.79  |
| ALDH3B2         | 3.08                 | 2.95   | 3.43   | 8.42                 | 6.80   | 6.96   |
| CHKA            | 23.65                | 28.42  | 30.75  | 51.80                | 39.92  | 44.67  |
| GAL             | 128.45               | 144.54 | 183.41 | 58.71                | 73.74  | 45.05  |
| FAM181B         | 1.08                 | 0.86   | 1.48   | 4.74                 | 2.83   | 3.11   |
| CTSC            | 41.89                | 39.20  | 34.39  | 18.05                | 25.87  | 19.70  |
| CEP295          | 1.27                 | 1.70   | 1.21   | 1.97                 | 2.00   | 1.91   |
| NPAT            | 2.33                 | 2.51   | 3.23   | 3.88                 | 3.57   | 3.15   |
| ETS1            | 9.84                 | 3.87   | 1.90   | 0.76                 | 1.30   | 0.73   |
| CCND2           | 41.60                | 33.42  | 29.01  | 72.87                | 61.02  | 66.07  |
| EMP1            | 4.29                 | 5.10   | 5.54   | 1.74                 | 3.40   | 1.86   |
| ARHGDIB         | 43.20                | 28.03  | 34.38  | 43.43                | 57.04  | 58.04  |
| FGD4            | 1.81                 | 2.15   | 2.02   | 3.34                 | 2.64   | 2.39   |
| PRICKLE1        | 5.72                 | 5.59   | 5.21   | 3.54                 | 3.87   | 2.66   |
| RAPGEF3         | 12.63                | 6.29   | 7.52   | 25.24                | 12.78  | 11.67  |
| WNT10B          | 7.28                 | 5.20   | 5.36   | 1.71                 | 2.24   | 1.45   |
| DDN             | 6.97                 | 6.14   | 6.89   | 6.17                 | 3.38   | 3.23   |
| IGFBP6          | 19.91                | 16.90  | 12.21  | 6.02                 | 9.68   | 6.22   |
| INHBE           | 10.64                | 4.48   | 5.16   | 1.06                 | 1.16   | 0.97   |
| AGAP2           | 0.56                 | 0.45   | 0.44   | 3.98                 | 2.21   | 3.00   |
| FRS2            | 2.45                 | 2.85   | 3.17   | 3.77                 | 3.55   | 3.57   |
| PHLDA1          | 21.03                | 12.33  | 9.75   | 4.03                 | 6.90   | 4.01   |
| CHST11          | 2.67                 | 0.84   | 1.05   | 0.72                 | 0.53   | 0.38   |
| MTERF2          | 3.14                 | 2.95   | 3.36   | 4.19                 | 5.38   | 6.45   |
| TXNRD1          | 173.22               | 129.01 | 176.78 | 101.03               | 100.02 | 87.57  |
| FAM109A         | 7.45                 | 4.28   | 3.85   | 16.00                | 8.58   | 5.63   |
| OAS1            | 4.53                 | 1.69   | 0.18   | 0.64                 | 0.54   | 0.67   |
| OASL            | 8.70                 | 17.64  | 5.43   | 1.09                 | 4.00   | 3.45   |
| HCAR2           | 9.55                 | 7.43   | 4.00   | 12.93                | 10.93  | 8.86   |
| MMP17           | 10.12                | 3.89   | 3.19   | 4.55                 | 2.13   | 2.67   |

| Sample/<br>Gene | Pica <sub>WT04</sub> |        |        | Pica <sub>KO36</sub> |        |        |
|-----------------|----------------------|--------|--------|----------------------|--------|--------|
|                 | 1                    | 2      | 3      | 1                    | 2      | 3      |
| PSPC1           | 39.38                | 38.36  | 48.45  | 16.10                | 27.81  | 22.75  |
| UBAC2           | 26.87                | 31.97  | 28.37  | 16.94                | 19.88  | 22.05  |
| COL4A1          | 3.49                 | 2.33   | 1.19   | 1.62                 | 1.07   | 0.52   |
| COL4A2          | 15.60                | 10.99  | 5.15   | 10.20                | 6.67   | 3.76   |
| MMP14           | 22.91                | 12.27  | 8.86   | 26.18                | 20.59  | 20.90  |
| CDH24           | 5.86                 | 2.57   | 3.49   | 3.28                 | 1.94   | 1.70   |
| PCK2            | 29.12                | 19.38  | 20.64  | 12.61                | 15.14  | 8.60   |
| IRF9            | 15.69                | 12.67  | 3.94   | 2.73                 | 3.24   | 5.24   |
| EGLN3           | 4.85                 | 4.77   | 3.25   | 8.34                 | 6.87   | 11.60  |
| NFKBIA          | 126.77               | 38.23  | 36.22  | 38.34                | 33.72  | 39.35  |
| DLGAP5          | 15.59                | 23.89  | 20.50  | 21.76                | 29.10  | 25.72  |
| TRIP11          | 7.38                 | 11.19  | 10.39  | 14.20                | 11.04  | 11.25  |
| OTUB2           | 22.18                | 14.31  | 13.67  | 6.87                 | 11.09  | 6.74   |
| PPP4R4          | 5.91                 | 3.12   | 2.35   | 1.08                 | 1.99   | 1.60   |
| IFI27           | 16.20                | 17.67  | 2.45   | 4.46                 | 1.56   | 4.02   |
| WARS            | 42.21                | 39.69  | 38.24  | 21.48                | 28.39  | 22.40  |
| CHAC1           | 19.49                | 10.89  | 12.60  | 6.77                 | 5.13   | 3.80   |
| TPM1            | 25.82                | 21.85  | 18.88  | 33.52                | 34.93  | 29.14  |
| STRA6           | 2.89                 | 1.44   | 1.74   | 1.02                 | 0.50   | 0.41   |
| HOMER2          | 17.28                | 17.14  | 19.03  | 6.39                 | 7.00   | 6.41   |
| PDE8A           | 18.28                | 10.34  | 9.78   | 7.47                 | 8.22   | 9.66   |
| HAPLN3          | 7.57                 | 4.66   | 2.57   | 3.05                 | 2.07   | 2.44   |
| ISG20           | 4.11                 | 3.33   | 2.11   | 0.46                 | 1.26   | 1.55   |
| SLCO3A1         | 4.36                 | 1.45   | 0.76   | 0.77                 | 0.62   | 0.79   |
| SYNM            | 1.85                 | 1.98   | 1.73   | 1.15                 | 1.05   | 0.63   |
| HAGHL           | 12.50                | 9.18   | 8.52   | 8.33                 | 4.48   | 5.51   |
| KREMEN2         | 8.65                 | 1.26   | 2.12   | 1.99                 | 1.31   | 1.25   |
| PKD1P1          | 15.04                | 6.79   | 6.59   | 17.58                | 6.18   | 5.63   |
| SMG1P2          | 3.86                 | 3.59   | 3.43   | 4.16                 | 3.90   | 3.01   |
| SLX1B           | 36.77                | 35.52  | 25.17  | 37.33                | 19.60  | 19.05  |
| SMG1P2          | 0.00                 | 0.91   | 1.88   | 0.00                 | 1.08   | 1.64   |
| GPT2            | 44.74                | 28.88  | 32.59  | 25.76                | 23.17  | 16.17  |
| IRX3            | 8.95                 | 4.80   | 4.43   | 5.34                 | 3.12   | 3.37   |
| LPCAT2          | 3.04                 | 3.48   | 3.11   | 1.56                 | 1.63   | 1.72   |
| MT1X            | 29.54                | 60.69  | 36.74  | 14.21                | 13.90  | 24.63  |
| MT2A            | 498.77               | 467.30 | 304.90 | 239.70               | 251.49 | 339.58 |
| KIFC3           | 29.47                | 25.72  | 24.93  | 50.28                | 37.86  | 38.69  |
| CDH5            | 10.93                | 7.53   | 7.14   | 22.57                | 15.58  | 9.42   |
| ST3GAL2         | 4.87                 | 3.62   | 2.26   | 2.32                 | 2.19   | 1.44   |
| ATP2C2          | 3.26                 | 1.62   | 1.94   | 1.06                 | 0.69   | 0.71   |
| TUBB3           | 12.75                | 9.90   | 8.27   | 7.54                 | 4.57   | 6.56   |
| GGT6            | 7.74                 | 6.08   | 5.58   | 14.94                | 8.11   | 12.20  |

| Sample/<br>Gene | Pica <sub>WT04</sub> |       |       | Pica <sub>KO36</sub> |       |       |
|-----------------|----------------------|-------|-------|----------------------|-------|-------|
|                 | 1                    | 2     | 3     | 1                    | 2     | 3     |
| ACADVL          | 53.56                | 38.84 | 35.62 | 25.02                | 30.77 | 29.34 |
| KCTD11          | 4.22                 | 2.81  | 3.47  | 9.67                 | 6.94  | 6.75  |
| NEURL4          | 9.70                 | 6.41  | 6.90  | 16.98                | 12.60 | 10.14 |
| CENPV           | 14.51                | 11.20 | 17.95 | 7.83                 | 7.89  | 8.37  |
| SLC47A2         | 13.75                | 10.75 | 8.71  | 21.66                | 19.28 | 20.63 |
| ALDH3A1         | 60.51                | 24.55 | 39.65 | 7.30                 | 10.87 | 9.02  |
| CDK5R1          | 2.12                 | 2.06  | 2.24  | 1.47                 | 0.99  | 0.79  |
| SLFN5           | 5.47                 | 1.95  | 1.09  | 1.65                 | 1.11  | 1.20  |
| SLFN13          | 3.92                 | 4.72  | 3.63  | 6.09                 | 5.65  | 5.71  |
| SLFN11          | 3.14                 | 3.55  | 2.59  | 5.37                 | 5.98  | 5.74  |
| MRM1            | 13.36                | 11.99 | 11.84 | 9.44                 | 8.45  | 6.42  |
| PGAP3           | 4.30                 | 3.18  | 3.08  | 6.56                 | 4.94  | 6.21  |
| IGFBP4          | 12.66                | 15.29 | 10.42 | 4.05                 | 3.35  | 1.90  |
| TNS4            | 16.86                | 10.48 | 7.66  | 20.07                | 17.29 | 14.95 |
| NAGLU           | 11.62                | 8.21  | 7.93  | 7.74                 | 5.37  | 4.90  |
| VAT1            | 16.05                | 11.83 | 10.57 | 6.31                 | 7.63  | 6.84  |
| HOXB9           | 3.00                 | 2.25  | 2.13  | 0.61                 | 0.69  | 0.42  |
| MRC2            | 4.21                 | 2.51  | 1.13  | 1.47                 | 0.84  | 1.04  |
| LINC00674       | 2.18                 | 2.60  | 2.61  | 3.38                 | 3.30  | 3.66  |
| SOX9            | 11.56                | 11.10 | 7.68  | 8.82                 | 7.81  | 4.06  |
| LINC00673       | 14.48                | 12.81 | 11.15 | 6.34                 | 9.37  | 6.66  |
| TRIM47          | 21.16                | 13.55 | 16.44 | 15.22                | 10.33 | 10.12 |
| CYGB            | 2.77                 | 0.77  | 0.78  | 4.00                 | 2.47  | 2.79  |
| ST6GALNA<br>C2  | 3.05                 | 1.45  | 3.36  | 5.83                 | 4.44  | 6.94  |
| TIMP2           | 4.11                 | 2.60  | 1.49  | 1.13                 | 1.11  | 1.80  |
| TBC1D16         | 8.92                 | 4.12  | 4.80  | 4.98                 | 2.65  | 2.07  |
| RAC3            | 22.76                | 16.61 | 20.07 | 14.51                | 11.81 | 12.48 |
| PYCR1           | 124.18               | 76.44 | 87.81 | 71.65                | 60.96 | 48.43 |
| METRNL          | 9.59                 | 8.66  | 5.57  | 2.72                 | 4.16  | 2.57  |
| TWSG1           | 6.89                 | 7.87  | 9.47  | 11.70                | 11.19 | 11.79 |
| ANKRD12         | 1.38                 | 2.73  | 2.23  | 2.52                 | 2.92  | 2.69  |
| CDH2            | 3.03                 | 4.15  | 3.25  | 1.24                 | 1.84  | 0.95  |
| FSTL3           | 3.61                 | 2.31  | 1.52  | 1.02                 | 1.02  | 1.12  |
| GAMT            | 41.93                | 30.01 | 31.58 | 24.79                | 21.78 | 24.53 |
| FSD1            | 7.58                 | 5.68  | 4.73  | 2.60                 | 1.95  | 1.91  |
| C3              | 33.25                | 1.94  | 0.51  | 0.67                 | 1.03  | 0.72  |
| ZNF358          | 5.57                 | 3.38  | 2.99  | 14.26                | 9.66  | 12.05 |
| ICAM1           | 42.52                | 8.53  | 5.89  | 7.39                 | 6.92  | 5.82  |
| NFIX            | 6.71                 | 5.62  | 4.92  | 3.63                 | 2.97  | 2.68  |
| PALM3           | 0.52                 | 0.70  | 0.80  | 3.97                 | 2.74  | 2.54  |
| ADGRL1          | 8.82                 | 4.07  | 4.40  | 4.95                 | 2.58  | 3.57  |

| Sample/<br>Gene | Pica <sub>WT04</sub> |       |       | Pica <sub>KO36</sub> |       |       |
|-----------------|----------------------|-------|-------|----------------------|-------|-------|
|                 | 1                    | 2     | 3     | 1                    | 2     | 3     |
| NOTCH3          | 7.56                 | 5.74  | 5.32  | 4.38                 | 2.55  | 2.90  |
| GDF15           | 168.63               | 69.38 | 58.21 | 82.08                | 57.33 | 47.92 |
| PDCD2L          | 28.57                | 27.41 | 29.90 | 18.59                | 21.06 | 14.58 |
| LRFN1           | 5.33                 | 2.96  | 3.94  | 2.27                 | 1.28  | 1.21  |
| BLVRB           | 54.29                | 35.57 | 46.40 | 66.26                | 69.38 | 77.89 |
| TGFB1           | 4.50                 | 3.57  | 1.82  | 0.21                 | 0.30  | 0.47  |
| RELB            | 9.60                 | 3.64  | 2.84  | 2.99                 | 1.59  | 3.07  |
| IGFL1           | 132.78               | 34.46 | 25.10 | 10.80                | 16.56 | 29.66 |
| ALDH16A1        | 13.96                | 8.15  | 7.27  | 5.27                 | 5.18  | 3.41  |
| KLK6            | 49.85                | 68.33 | 81.35 | 38.01                | 47.94 | 30.67 |
| TRIB3           | 82.92                | 53.09 | 63.16 | 50.17                | 45.49 | 33.67 |
| RSPO4           | 3.07                 | 1.56  | 1.72  | 0.33                 | 0.27  | 0.48  |
| C20orf194       | 1.80                 | 1.79  | 1.26  | 3.22                 | 2.17  | 2.87  |
| JAG1            | 23.55                | 17.09 | 12.60 | 9.73                 | 7.64  | 5.19  |
| GIN51           | 19.50                | 27.66 | 31.44 | 33.06                | 39.01 | 43.62 |
| ZNF337          | 7.33                 | 8.21  | 7.52  | 12.15                | 12.30 | 10.98 |
| SDC4            | 64.39                | 30.84 | 28.53 | 20.91                | 26.38 | 28.44 |
| CYP24A1         | 13.22                | 7.43  | 5.12  | 1.58                 | 1.25  | 2.73  |
| BMP7            | 3.21                 | 1.92  | 1.73  | 0.50                 | 0.33  | 0.36  |
| HELZ2           | 9.38                 | 3.70  | 1.78  | 4.43                 | 1.84  | 1.75  |
| ARFRP1          | 17.38                | 14.81 | 15.65 | 9.24                 | 8.32  | 7.53  |
| RGS19           | 8.40                 | 5.69  | 6.48  | 6.79                 | 2.29  | 4.34  |
| C2CD2           | 5.69                 | 5.09  | 5.12  | 14.08                | 11.38 | 12.42 |
| RIPK4           | 15.06                | 11.93 | 13.48 | 28.50                | 19.25 | 21.49 |
| ZBTB21          | 2.53                 | 3.09  | 2.99  | 4.34                 | 3.74  | 3.38  |
| MX1             | 4.72                 | 3.54  | 1.10  | 0.49                 | 1.10  | 0.96  |
| CBS             | 23.60                | 18.28 | 20.64 | 13.13                | 13.93 | 10.93 |
| PDE9A           | 5.07                 | 3.52  | 4.31  | 1.64                 | 1.03  | 0.58  |
| SLC19A1         | 39.77                | 26.57 | 27.14 | 33.95                | 19.64 | 14.03 |
| ZDHHC8          | 4.53                 | 2.84  | 1.63  | 1.13                 | 0.67  | 0.83  |
| MN1             | 1.10                 | 1.52  | 0.82  | 3.86                 | 2.18  | 2.09  |
| LIF             | 43.76                | 25.94 | 34.73 | 21.84                | 17.31 | 25.74 |
| HMOX1           | 12.11                | 5.77  | 4.95  | 3.45                 | 3.16  | 3.71  |
| C1QTNF6         | 22.73                | 19.58 | 15.98 | 37.97                | 27.44 | 31.72 |
| GCAT            | 11.97                | 11.36 | 13.09 | 8.73                 | 8.61  | 6.31  |
| APOBEC3B        | 40.28                | 21.51 | 27.85 | 12.89                | 13.21 | 12.49 |
| TBL1X           | 7.98                 | 7.60  | 6.63  | 4.81                 | 5.34  | 3.76  |
| SPIN4           | 3.19                 | 3.51  | 2.85  | 7.48                 | 6.81  | 6.70  |
| LINC01278       | 3.37                 | 3.45  | 3.17  | 5.44                 | 7.15  | 5.64  |
| AMER1           | 1.34                 | 1.17  | 1.43  | 3.06                 | 2.51  | 1.95  |
| ARHGEF9         | 1.34                 | 1.42  | 1.20  | 3.41                 | 3.34  | 3.26  |
| LAS1L           | 17.27                | 20.09 | 22.58 | 31.76                | 31.58 | 28.19 |

| Sample/<br>Gene | Pica <sub>WT04</sub> |        |        | Pica <sub>KO36</sub> |         |        |
|-----------------|----------------------|--------|--------|----------------------|---------|--------|
|                 | 1                    | 2      | 3      | 1                    | 2       | 3      |
| MSN             | 59.54                | 53.39  | 49.48  | 72.23                | 92.48   | 76.62  |
| YIPF6           | 5.26                 | 5.59   | 5.00   | 10.39                | 10.24   | 9.42   |
| PJA1            | 5.05                 | 5.65   | 4.14   | 6.67                 | 9.40    | 8.38   |
| IGBP1           | 12.97                | 14.33  | 17.46  | 26.33                | 33.88   | 37.59  |
| PDZD11          | 17.95                | 22.81  | 24.53  | 31.86                | 44.84   | 43.11  |
| KIF4A           | 8.36                 | 10.24  | 8.87   | 16.49                | 18.96   | 17.24  |
| FOXO4           | 2.96                 | 2.55   | 2.09   | 5.99                 | 5.87    | 6.68   |
| SNX12           | 20.29                | 20.10  | 21.39  | 33.39                | 38.45   | 36.27  |
| DLG3            | 8.51                 | 9.68   | 9.03   | 15.59                | 17.46   | 17.36  |
| MED12           | 4.41                 | 4.29   | 3.92   | 8.61                 | 7.24    | 5.50   |
| ERCC6L          | 4.04                 | 4.84   | 5.23   | 8.15                 | 8.80    | 6.82   |
| HDAC8           | 8.55                 | 11.42  | 10.07  | 15.32                | 20.47   | 20.37  |
| PHKA1           | 1.97                 | 2.10   | 2.24   | 4.14                 | 3.88    | 2.98   |
| RLIM            | 4.00                 | 4.67   | 4.34   | 8.64                 | 8.04    | 7.02   |
| ABCB7           | 6.26                 | 6.90   | 7.12   | 9.26                 | 13.81   | 11.92  |
| MAGT1           | 11.68                | 13.54  | 13.06  | 19.95                | 23.40   | 20.84  |
| RPS4X           | 574.02               | 724.51 | 765.61 | 1086.02              | 1522.04 | 1524.7 |
| COX7B           | 107.45               | 175.30 | 172.03 | 165.89               | 318.18  | 276.70 |
| ATRX            | 3.61                 | 6.57   | 5.03   | 11.83                | 10.26   | 10.67  |
| ATP7A           | 0.96                 | 0.91   | 0.74   | 2.76                 | 1.78    | 1.69   |
| TAF9B           | 4.22                 | 5.79   | 4.97   | 10.51                | 12.15   | 9.81   |
| BRWD3           | 1.52                 | 1.41   | 1.01   | 3.35                 | 2.78    | 2.20   |
| APOOL           | 1.99                 | 2.00   | 2.25   | 3.93                 | 4.60    | 4.37   |
| CHM             | 1.41                 | 1.96   | 2.01   | 3.35                 | 3.68    | 3.48   |
| PGK1            | 127.22               | 138.00 | 148.60 | 206.03               | 269.12  | 295.34 |
| PCDH19          | 1.93                 | 0.21   | 0.35   | 5.47                 | 2.97    | 2.61   |
| SRPX2           | 2.94                 | 1.25   | 0.62   | 5.43                 | 4.73    | 6.69   |
| TSPAN6          | 6.78                 | 6.11   | 6.39   | 10.40                | 15.96   | 11.34  |
| DIAPH2          | 2.13                 | 2.87   | 2.72   | 4.21                 | 5.31    | 5.08   |
| CSTF2           | 12.98                | 11.47  | 12.79  | 23.46                | 22.44   | 19.22  |
| CENPI           | 1.60                 | 1.33   | 1.60   | 2.87                 | 3.88    | 2.87   |
| TRMT2B          | 3.87                 | 4.11   | 3.82   | 6.60                 | 6.67    | 5.94   |
| NONO            | 109.58               | 128.99 | 128.10 | 192.37               | 233.32  | 233.17 |
| TCEAL8          | 13.19                | 19.20  | 18.46  | 21.75                | 40.42   | 43.04  |
| WBP5            | 14.89                | 20.68  | 15.96  | 22.42                | 43.63   | 41.06  |
| TCEAL1          | 2.48                 | 4.11   | 4.45   | 7.20                 | 8.08    | 11.69  |
| NGFRAP1         | 97.12                | 105.60 | 89.54  | 142.49               | 177.40  | 180.96 |
| RPL36A          | 273.09               | 435.56 | 482.76 | 444.18               | 858.75  | 971.18 |
| TCEAL4          | 18.84                | 28.77  | 25.61  | 28.78                | 50.19   | 54.13  |
| CXorf57         | 0.61                 | 1.00   | 1.06   | 1.57                 | 2.69    | 1.77   |
| FAM199X         | 6.37                 | 7.49   | 6.64   | 13.63                | 12.13   | 10.81  |
| NUP62CL         | 2.17                 | 2.28   | 2.11   | 4.27                 | 5.84    | 4.44   |

| Sample/<br>Gene | Pica <sub>WT04</sub> |        |        | Pica <sub>KO36</sub> |        |        |
|-----------------|----------------------|--------|--------|----------------------|--------|--------|
|                 | 1                    | 2      | 3      | 1                    | 2      | 3      |
| RBM41           | 1.39                 | 2.87   | 2.38   | 3.52                 | 3.39   | 3.01   |
| PRPS1           | 20.57                | 22.22  | 23.84  | 33.21                | 44.52  | 36.40  |
| PSMD10          | 31.24                | 43.55  | 43.87  | 54.00                | 78.43  | 70.89  |
| NXT2            | 3.41                 | 2.81   | 2.88   | 5.96                 | 6.14   | 7.08   |
| ACSL4           | 5.11                 | 7.61   | 7.63   | 9.79                 | 13.10  | 9.71   |
| TMEM164         | 3.32                 | 3.09   | 3.37   | 7.50                 | 7.43   | 6.49   |
| AMMECR1         | 2.89                 | 2.95   | 2.95   | 5.60                 | 4.63   | 4.52   |
| ALG13           | 2.72                 | 3.57   | 4.55   | 5.05                 | 6.71   | 6.92   |
| MORF4L2         | 83.41                | 109.89 | 114.89 | 125.46               | 173.62 | 168.46 |
| KLHL13          | 3.04                 | 4.10   | 3.58   | 7.57                 | 8.06   | 7.38   |
| IL13RA1         | 9.03                 | 9.31   | 8.29   | 13.84                | 21.45  | 17.58  |
| PLS3            | 35.05                | 40.61  | 36.47  | 47.87                | 68.28  | 56.76  |
| UPF3B           | 22.61                | 33.22  | 35.74  | 33.88                | 49.19  | 42.22  |
| ZBTB33          | 12.12                | 14.31  | 14.13  | 19.92                | 19.78  | 18.25  |
| C1GALT1C1       | 15.94                | 19.02  | 19.67  | 21.21                | 27.74  | 27.79  |
| THOC2           | 11.81                | 16.09  | 14.32  | 17.95                | 18.47  | 18.48  |
| XIAP            | 12.03                | 13.53  | 11.67  | 17.10                | 16.57  | 16.54  |
| ELF4            | 16.65                | 14.93  | 15.33  | 26.85                | 23.31  | 22.16  |
| RBMX2           | 17.96                | 22.52  | 22.78  | 25.43                | 39.56  | 36.35  |
| PHF6            | 13.64                | 19.04  | 19.45  | 27.32                | 28.41  | 24.12  |
| STAG2           | 25.99                | 31.07  | 27.00  | 40.98                | 40.04  | 37.02  |
| MBNL3           | 1.72                 | 2.61   | 1.75   | 4.32                 | 3.45   | 3.08   |
| SLC9A6          | 5.15                 | 4.85   | 5.18   | 6.94                 | 7.71   | 7.92   |
| VGLL1           | 1.62                 | 0.19   | 0.81   | 5.23                 | 4.33   | 6.91   |
| FHL1            | 17.96                | 14.14  | 12.45  | 7.14                 | 10.59  | 8.95   |
| ATP11C          | 2.37                 | 3.13   | 3.20   | 5.18                 | 4.67   | 4.53   |
| LDOC1           | 14.79                | 10.62  | 12.27  | 39.52                | 30.21  | 29.74  |
| IDS             | 5.36                 | 3.80   | 5.22   | 10.91                | 8.67   | 7.65   |
| CXorf40B        | 10.28                | 9.01   | 12.87  | 16.10                | 18.17  | 17.58  |
| TMEM185A        | 5.90                 | 3.70   | 4.84   | 11.77                | 9.99   | 10.37  |
| FMR1            | 5.99                 | 7.86   | 7.45   | 12.92                | 14.13  | 13.77  |
| CD99L2          | 1.42                 | 1.54   | 1.82   | 3.30                 | 2.78   | 2.75   |
| MTMR1           | 10.31                | 11.33  | 9.91   | 21.13                | 20.90  | 22.18  |
| VMA21           | 4.45                 | 7.37   | 7.64   | 10.44                | 13.39  | 11.28  |
| HMGB3           | 14.58                | 19.66  | 20.85  | 29.27                | 35.76  | 35.81  |
| CETN2           | 13.64                | 27.37  | 26.37  | 29.16                | 43.59  | 46.76  |
| ZNF275          | 2.04                 | 2.09   | 2.03   | 4.00                 | 2.98   | 3.23   |
| NSDHL           | 13.05                | 19.83  | 22.43  | 33.37                | 35.97  | 42.32  |
| MAGEA4          | 126.45               | 154.44 | 166.61 | 230.23               | 268.43 | 261.35 |
| FAM58A          | 8.55                 | 9.48   | 9.13   | 20.85                | 17.30  | 16.01  |
| HAUS7           | 12.30                | 10.17  | 13.25  | 27.15                | 23.75  | 22.45  |
| SLC6A8          | 1.97                 | 1.94   | 1.59   | 4.62                 | 2.90   | 5.77   |



| Sample/<br>Gene | Pica <sub>WT04</sub> |        |        | Pica <sub>KO36</sub> |        |        |
|-----------------|----------------------|--------|--------|----------------------|--------|--------|
|                 | 1                    | 2      | 3      | 1                    | 2      | 3      |
| ABCD1           | 4.31                 | 2.81   | 3.05   | 11.57                | 6.13   | 6.66   |
| PLXNB3          | 1.25                 | 0.59   | 0.61   | 3.76                 | 1.80   | 1.68   |
| L1CAM           | 2.18                 | 1.55   | 1.63   | 10.53                | 7.21   | 4.87   |
| BCAP31          | 131.41               | 146.12 | 159.71 | 258.48               | 301.59 | 281.43 |
| NAA10           | 46.31                | 40.34  | 51.56  | 75.41                | 82.40  | 80.35  |
| SSR4            | 86.44                | 93.87  | 96.67  | 139.35               | 180.95 | 186.47 |
| TMEM187         | 4.81                 | 4.17   | 4.02   | 9.15                 | 8.23   | 10.11  |
| MECP2           | 10.09                | 7.92   | 8.49   | 22.05                | 19.12  | 18.42  |
| IRAK1           | 99.68                | 57.29  | 69.12  | 208.14               | 119.31 | 121.26 |
| FUNDC2          | 14.81                | 21.49  | 20.50  | 21.23                | 31.42  | 28.54  |
| BRCC3           | 9.27                 | 10.16  | 9.51   | 16.04                | 16.88  | 16.49  |
| CLIC2           | 0.48                 | 0.46   | 0.49   | 1.03                 | 2.18   | 2.00   |
